# Supplementary material for: The Transcriptional Mediator Component Med12 Is Required for Hindbrain Boundary Formation
Source: PubMed Central journal article supplement (PMC3080914; doi:10.1371/journal.pone.0019076), 2011-04-21

Ctrl MO

Trap230 MO

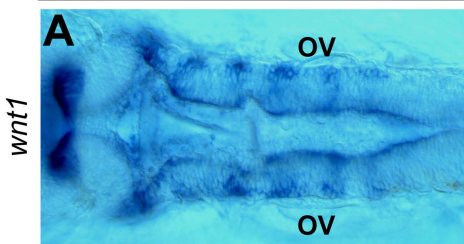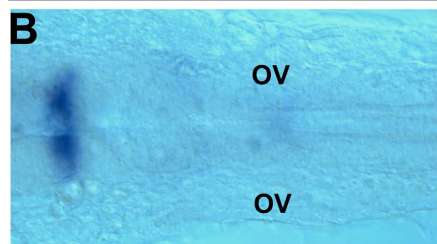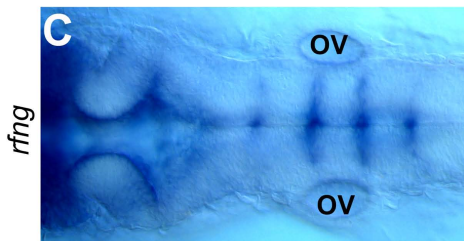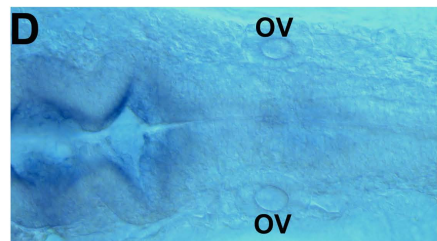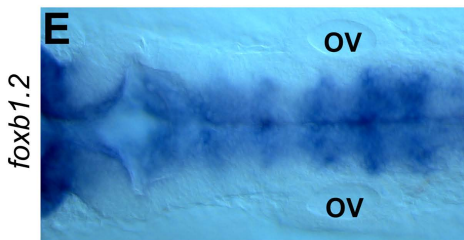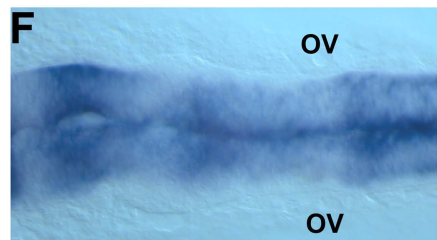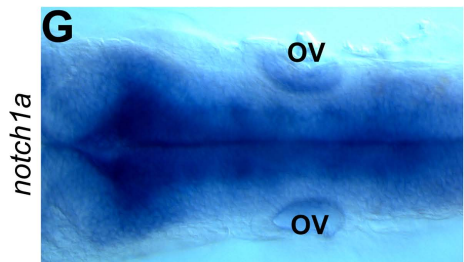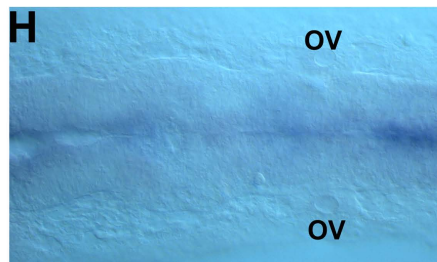

Supplement: pone.0019076.s001.pdf [file pone.0019076.s001.pdf]
